# Supplementary material for: Contrasting antibody responses to intrasubtype superinfection with CRF02_AG
Source: PubMed Central journal article supplement (PMC5348025; doi:10.1371/journal.pone.0173705), 2017-03-13
Supplement: pone.0173705.s003.pdf [file pone.0173705.s003.pdf]

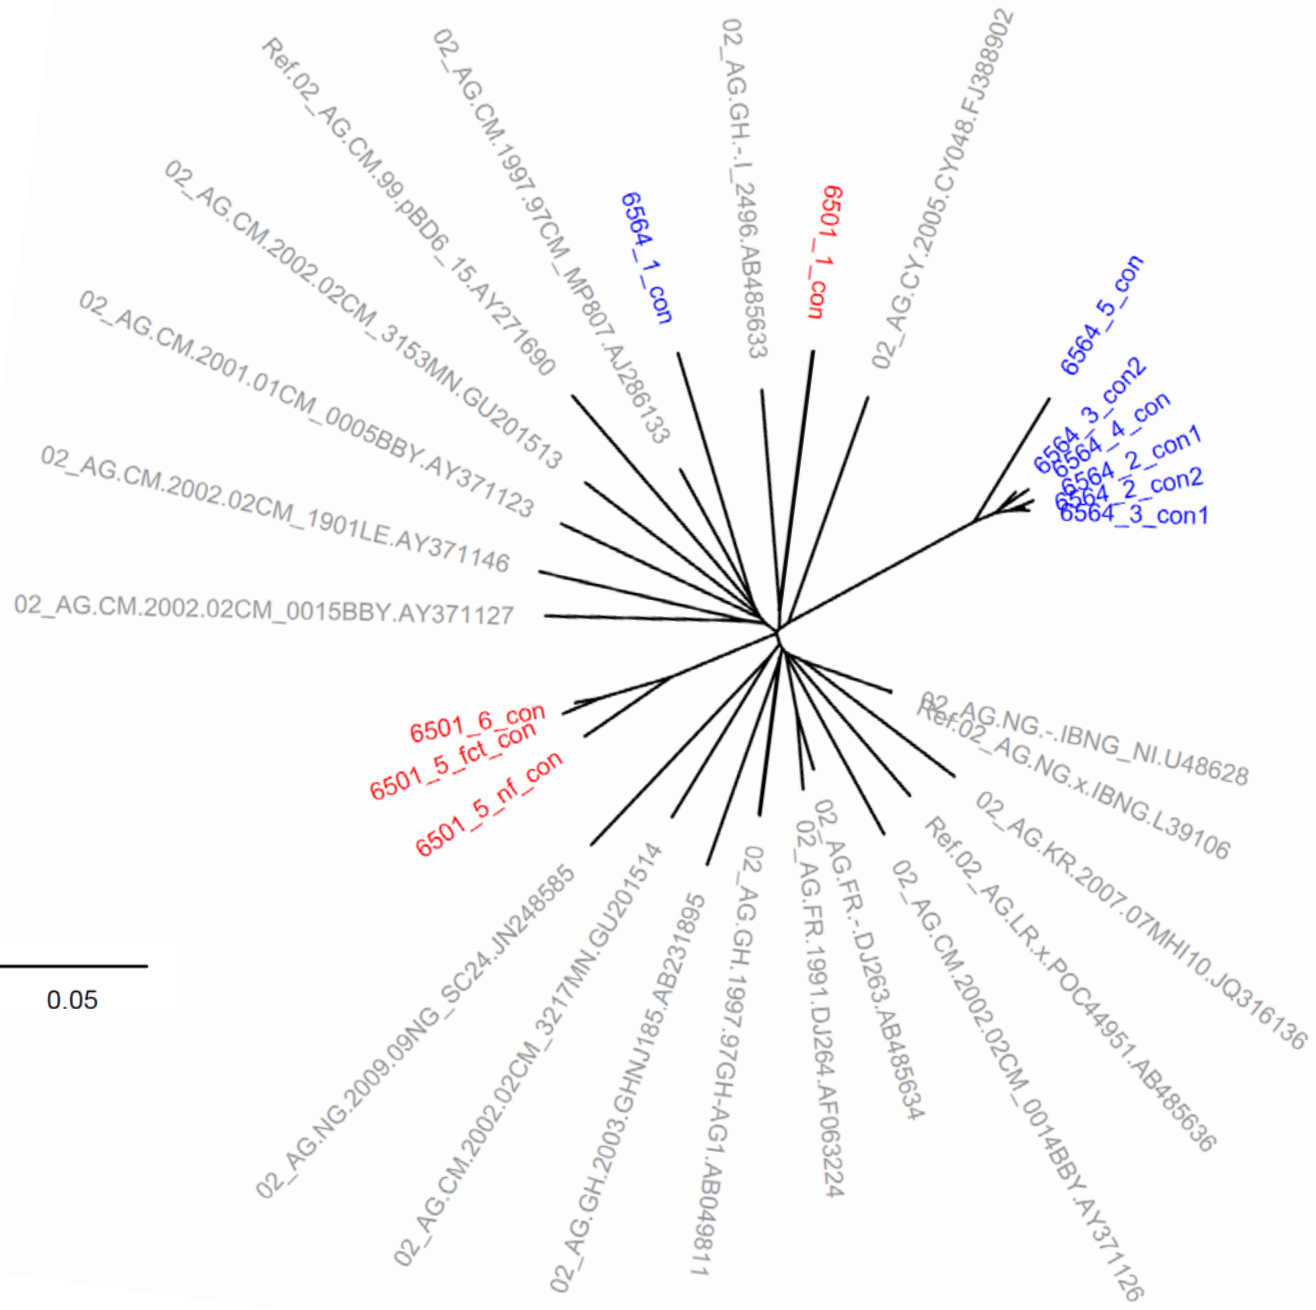

env region 6225 - 7817

**S3 Fig. Phylogenetic *env* tree with diverse CRF02\_AG Reference strains and patient consensus sequences.** *Envelope* consensus sequences (con) were generated for each analyzed patient time point of 6501 (red) and 6564 (blue). If two distinct populations appeared per time point, separate consensus sequences were derived (6501\_5; 6564\_2 and 6564\_3). Patient consensus sequences were aligned with diverse CRF02\_AG Reference sequences downloaded from the Los Alamos Database (grey). They include representatives of all major CRF02\_AG branches and CRF02\_AG strains with highest similarity to the patients' con sequences according to HIV Blast. Neighbor joining phylogenetic trees were generated using MEGA and FigTree software.
