# Supplementary material for: Contrasting antibody responses to intrasubtype superinfection with CRF02_AG
Source: PubMed Central journal article supplement (PMC5348025; doi:10.1371/journal.pone.0173705), 2017-03-13
Supplement: pone.0173705.s006.pdf [file pone.0173705.s006.pdf]

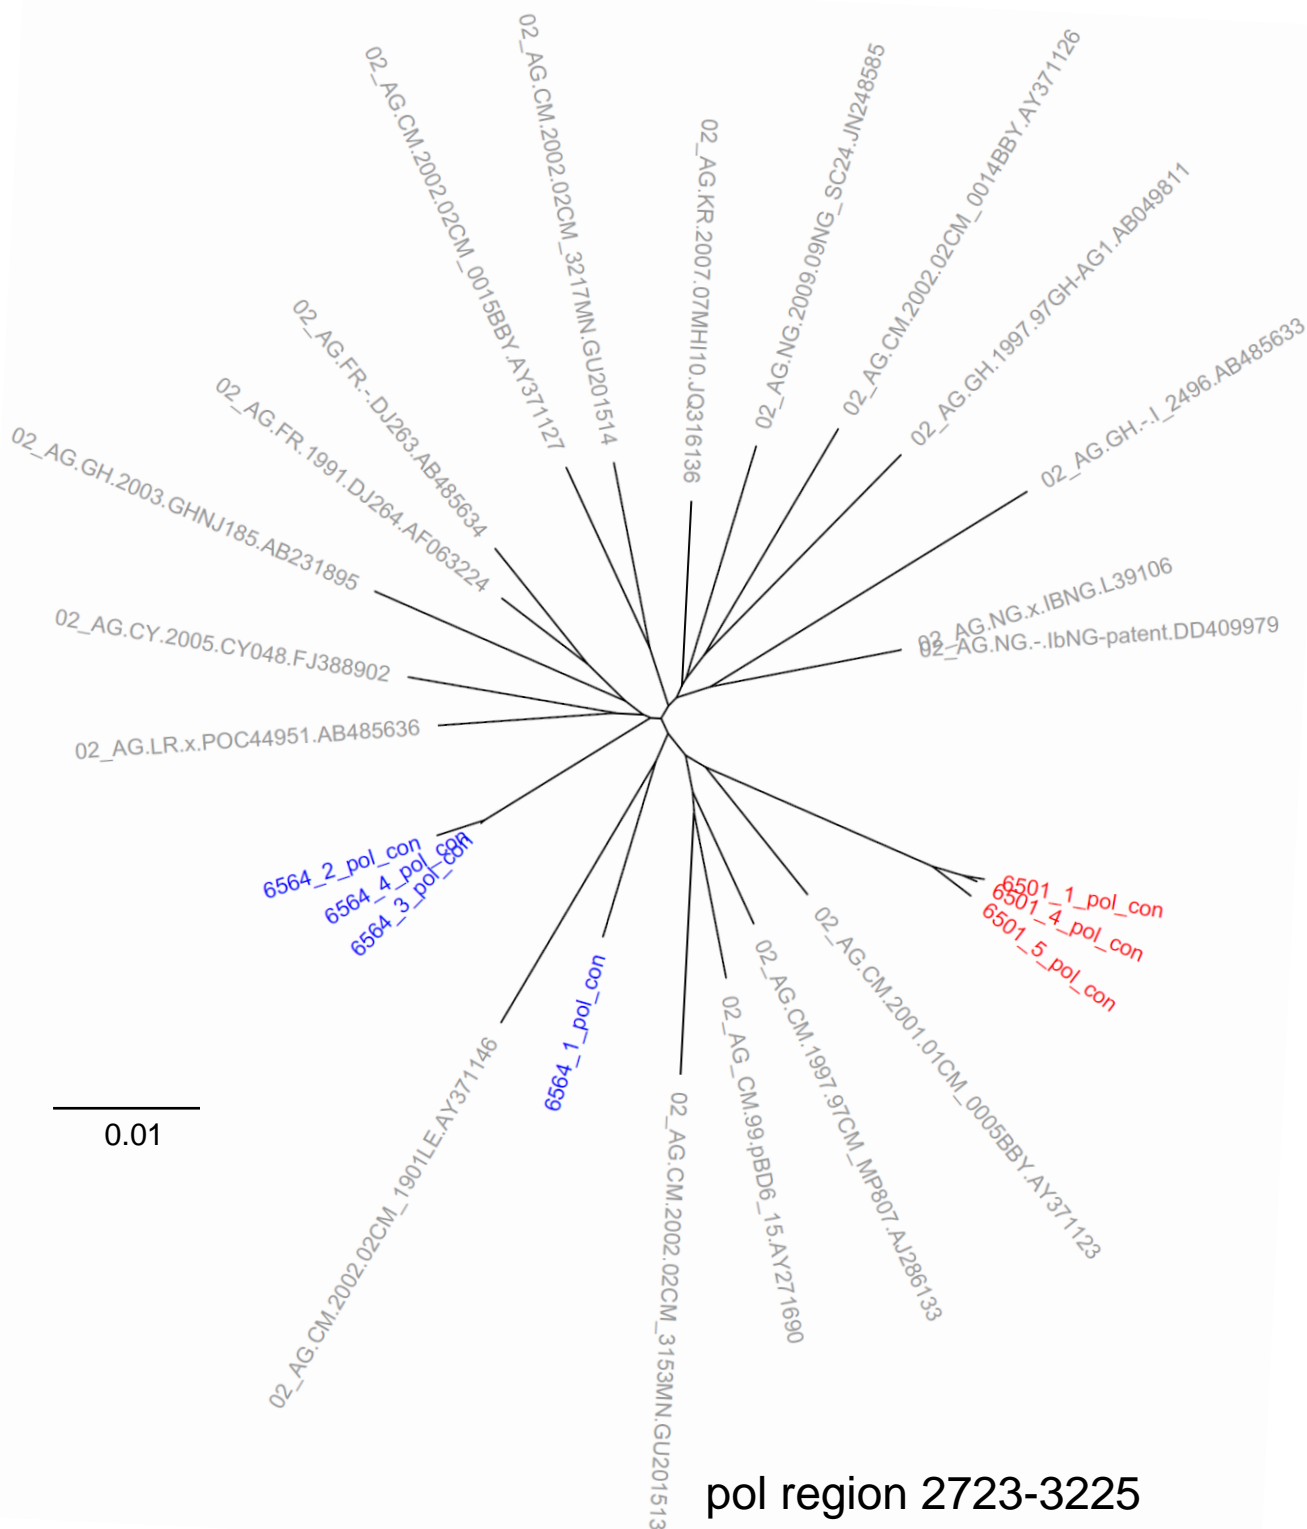

**S6 Fig. Phylogenetic pol tree with diverse CRF02\_AG Reference strains and patient consensus sequences.** Representative pol consensus sequences (con) were generated for each analyzed NGS patient time point from 6501 (red) and 6564 (blue). Patient consensus sequences were aligned with diverse CRF02\_AG Reference sequences downloaded from the Los Alamos Database (grey). They include representatives of all major CRF02\_AG branches and CRF02\_AG strains with highest similarity to the patients' con sequences according to HIV Blast. Neighbor joining phylogenetic trees were generated using MEGA and FigTree software
