# Supplementary material for: Contrasting antibody responses to intrasubtype superinfection with CRF02_AG
Source: PubMed Central journal article supplement (PMC5348025; doi:10.1371/journal.pone.0173705), 2017-03-13
Supplement: pone.0173705.s008.pdf [file pone.0173705.s008.pdf]

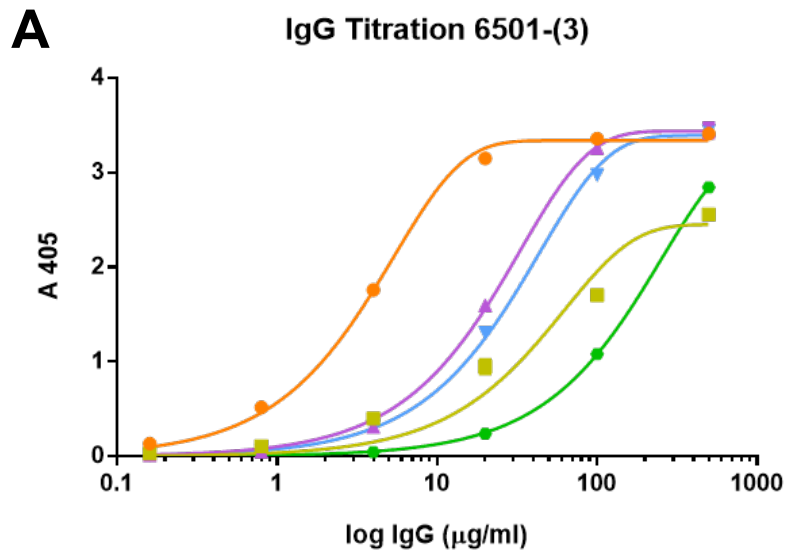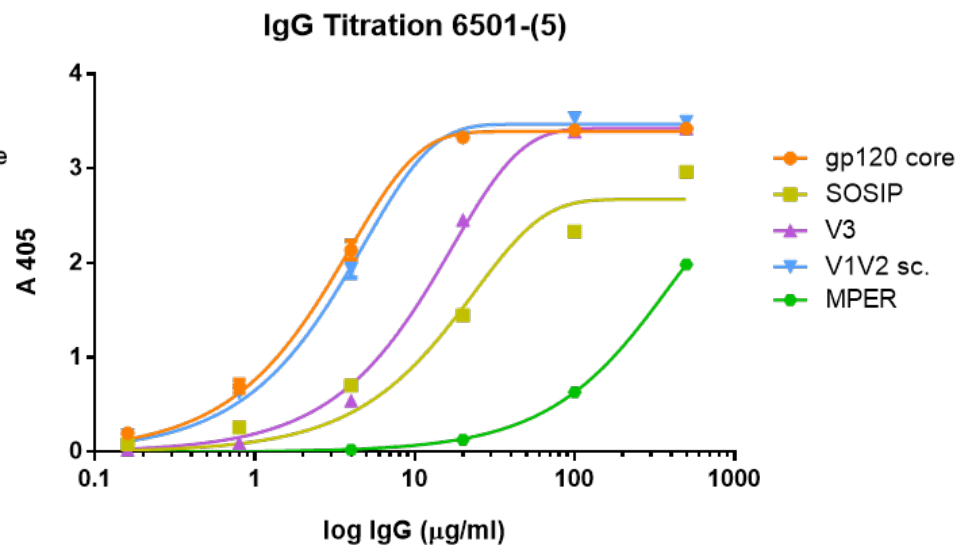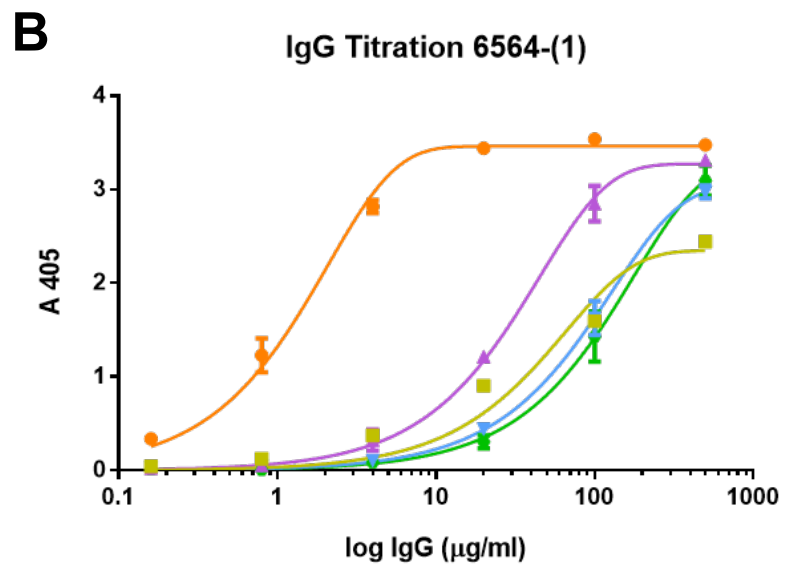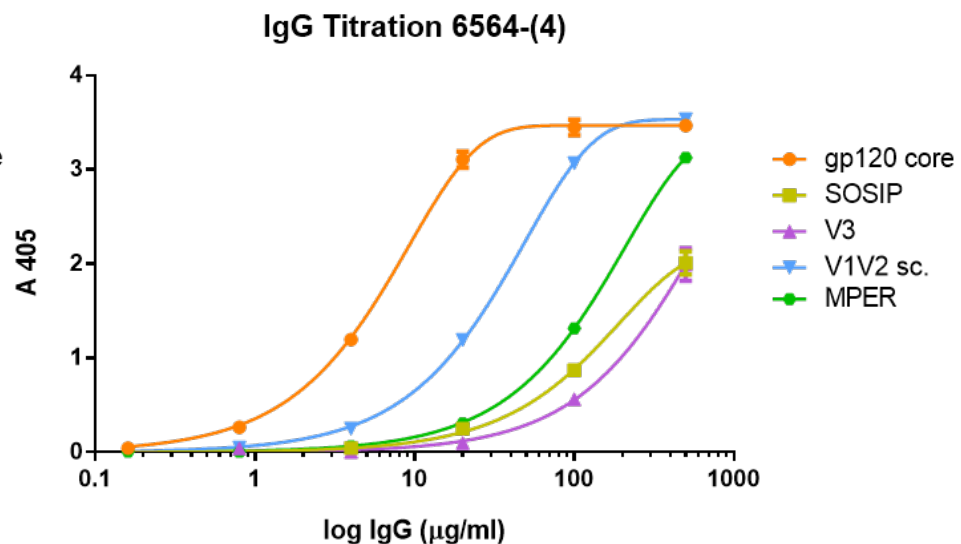

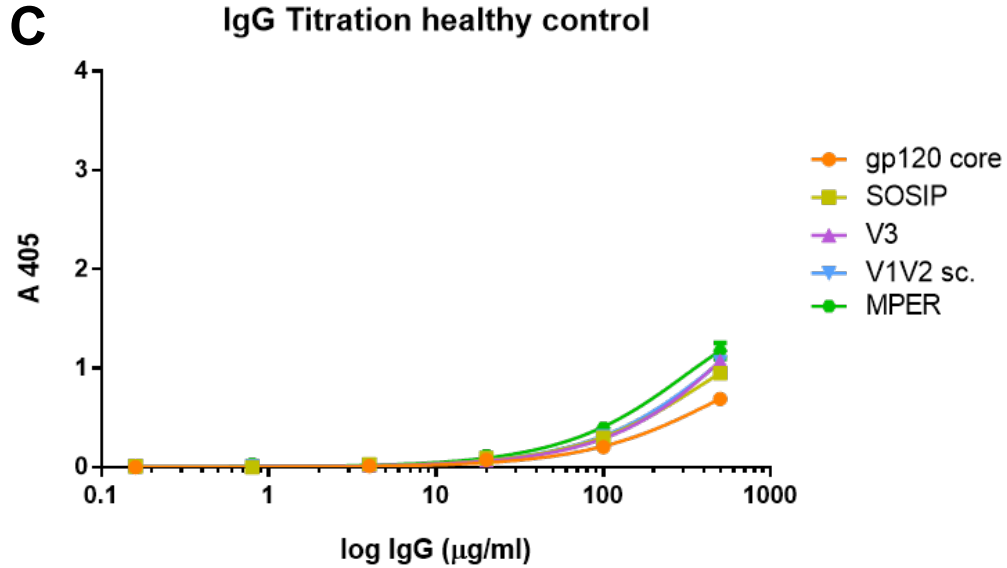

**S8 Fig. Differential binding patterns of plasma purified IgG to Env antigens pre and post superinfection. A)** ELISA binding curves of plasma purified IgG from NYU6501 time point 3, pre, and time point 5, post SI to indicated envelope antigens. **B)** ELISA binding curves of plasma purified IgG from NYU6564 time point 1, pre, and time point 4, post SI to indicated envelope antigens. **C)** ELISA binding curves of IgG purified from a healthy, HIV negative Cameroonian individual to envelope antigens. Nonlinear regression curves were fit in GraphPad Prism
