# Supplementary material for: Contrasting antibody responses to intrasubtype superinfection with CRF02_AG
Source: PubMed Central journal article supplement (PMC5348025; doi:10.1371/journal.pone.0173705), 2017-03-13
Supplement: pone.0173705.s009.pdf [file pone.0173705.s009.pdf]

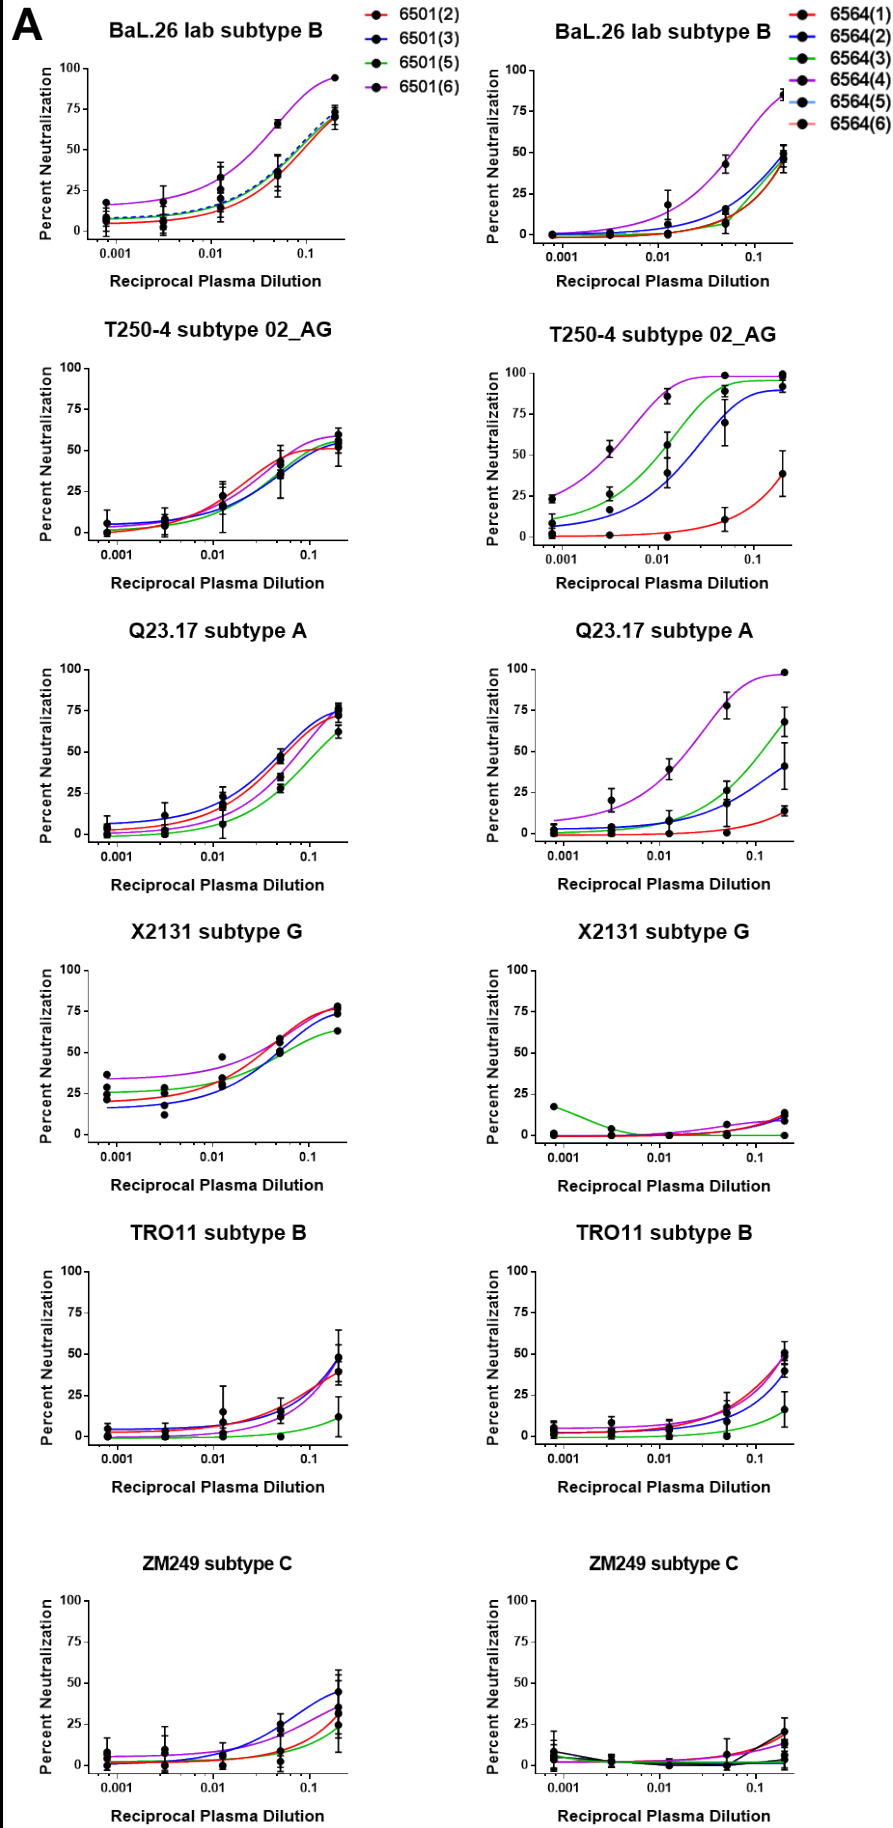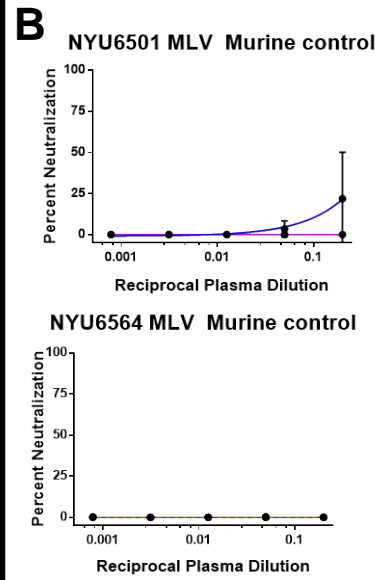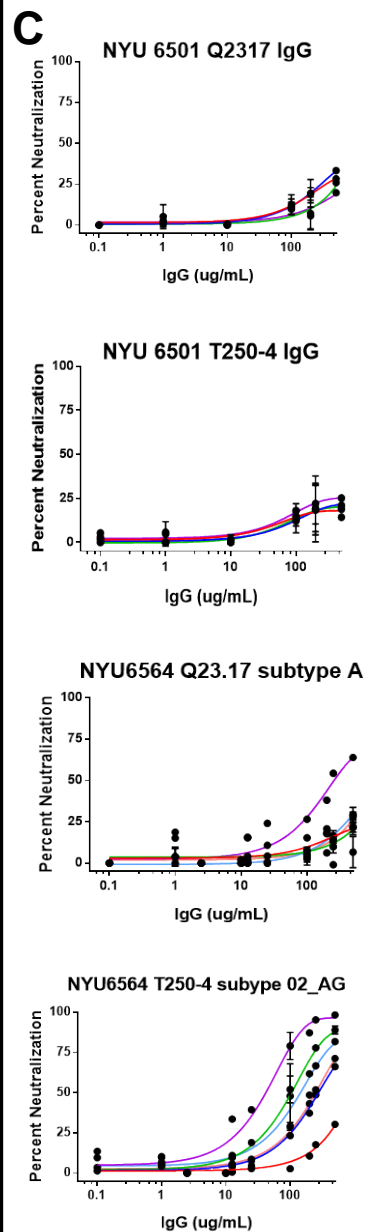

**S9 Fig. Heterologous neutralization curves with pseudoviruses.**

**A) Left:** Neutralization curves for NYU6501 plasma samples, also used to calculate IC50s in **Fig 6A** main article. **Right:** Neutralization curves for NYU6564 plasma samples. **B)** MLV (Murine Leukemia Virus) neutralization curves for NYU6501 and NYU6564 plasma samples, used as negative controls. **C)** IgG neutralization curves for NYU6501 and NYU6564 to Q23.17 and T250-4, also used to calculate the IC50 values in **Fig 6B** of the main article. All neutralization assays were carried out as described in Supplementary Methods [11] and were repeated at least twice. Neutralization curves are shown as nonlinear regression fits, calculated in GraphPad Prism
