# Supplementary material for: Contrasting antibody responses to intrasubtype superinfection with CRF02_AG
Source: PubMed Central journal article supplement (PMC5348025; doi:10.1371/journal.pone.0173705), 2017-03-13
Supplement: pone.0173705.s010.pdf [file pone.0173705.s010.pdf]

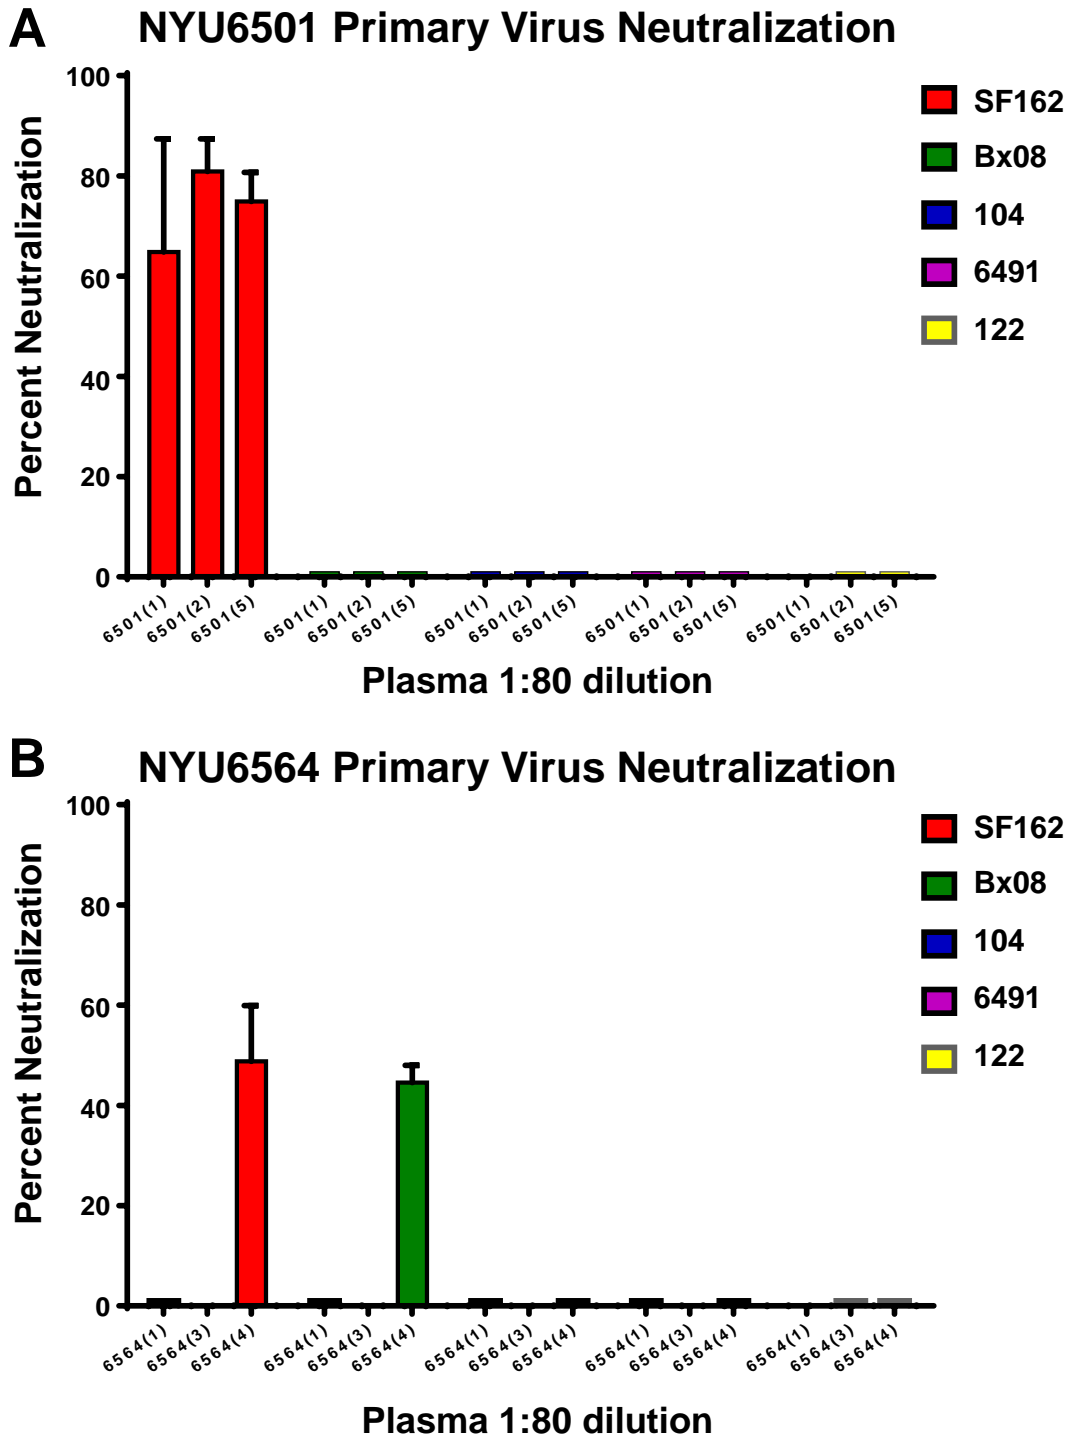

**S10 Fig. Neutralization of virus isolates by NYU6501 and NYU6564.** Neutralization assays carried out for **A)** NYU6501 and **B)** NYU6564 with plasma samples at 1:80 dilution to virus isolates SF162 (B) and Bx08 (B) as well as primary viruses 104 (F2), 6491 (G), and 122 (CRF02\_AG). Indinavir was added to limit replication to single round infections
