# Supplementary material for: Contrasting antibody responses to intrasubtype superinfection with CRF02_AG
Source: PubMed Central journal article supplement (PMC5348025; doi:10.1371/journal.pone.0173705), 2017-03-13
Supplement: pone.0173705.s011.pdf [file pone.0173705.s011.pdf]

# 6564 - bnAb + CD4 epitopes / N-Glycosylation sites

|                         | 1          |            |            |             |             |              |            |            |            |             | N88 | 100 |
|-------------------------|------------|------------|------------|-------------|-------------|--------------|------------|------------|------------|-------------|-----|-----|
| Ref.B_HXB2              | MRVKEKYQHL | WRWGWRWGM  | LLGMLMICA  | TEKLWVTVY   | GVPVWKEAT   | TLFCASDAKA   | YDTEVHNVA  | THACVPTDPN | PQEVVLTMT  | ENFNMWKNM   |     |     |
| NYU6564-1-con           | MRVME-IQKN | YPLLWRWGM  | ISLLMIMCNA | N-KLWVTVY   | GVPVWRDAET  | TLFCASDAKA   | YDTEAHNVA  | THACVPTDPN | PQEMNLTMT  | EKFNMWKNM   |     |     |
| NYU6564-2-con1          | MRVMG-IQRN | CPLFWRWGTI | IFWIMIICA  | -EQLWVTVY   | GVPVWKAET   | TLFCASDAKA   | FDTEVHNVA  | THACVPTDPD | PQEMELKNVT | ENFNMWKNMG  |     |     |
| NYU6564-2-con2          | MRVMG-IQRN | CPLFWRWGTI | IFWIMIICA  | -EQLWVTVY   | GVPVWKAET   | TLFCASDAKA   | FDTEVHNVA  | THACVPTDPD | PQEMELKNVT | ENFNMWKNMG  |     |     |
| NYU6564-3-con1          | MRVMG-IQRN | CPLFWRWGTI | IFWIMIICA  | -EQLWVTVY   | GVPVWKAET   | TLFCASDAKA   | FDTEVHNVA  | THACVPTDPD | PQEMELKNVT | ENFNMWKNMG  |     |     |
| NYU6564-3-con2          | MRVMG-IQRN | CPLFWRWGTI | IFWIMIICA  | -EQLWVTVY   | GVPVWKAET   | TLFCASDAKA   | FDTEVHNVA  | THACVPTDPD | PQEMELKNVT | ENFNMWKNMG  |     |     |
| NYU6564-4-con           | MRVMG-IQRN | CPLFWKWSTI | IFWIMIICA  | -EQLWVTVY   | GVPVWKAET   | TLFCASDAKA   | FDAEVHNVA  | THACVPTDPD | PQEMELKNVT | ENFNMWKNMG  |     |     |
| -----V1-----V2-----     |            |            |            |             |             |              |            |            |            |             |     |     |
|                         | 101        |            | R4         |             |             | N156         | N160       | K169       | R4         |             |     | 193 |
| Ref.B_HXB2              | VEQMEDIIS  | LWDQSLKPCV | KLTPLCVSLK | CTDLKNDTNT  | NSSSGRMIME  | KGEIVKCSFN   | ISTTSIRGPD | KEYAFFYKLD | IIPIDN---- | ---DTSYKL   |     |     |
| NYU6564-1-con           | VEQMHTDIIS | LWEQSLKPCV | KLTPLCVTLV | CDLTKNDTNT  | -E-SNMNEDM  | GGEIVKCSFN   | TTEIRDKK   | RITSLFYKLD | VVPLEGNSIS | SNNGSRQYRL  |     |     |
| NYU6564-2-con1          | VDQMHQDIIS | LWDQSLKPCV | KLTPLCVTLT | CVANAVTRNN  | -TLHNVTDGI  | GGEIVKCSFN   | TTTVLRDKK  | RVHALFYKLD | VVQIGE---- | ---DNQTYRL  |     |     |
| NYU6564-2-con2          | VDQMHQDIIS | LWDQSLKPCV | KLTPLCVTLT | CVANAVTRNN  | -TLHNVTDGI  | GGEIVKCSFN   | TTTVLRDKK  | RVQALFYKLD | VVQIGE---- | ---DNQTYRL  |     |     |
| NYU6564-3-con1          | VDQMHQDIIS | LWDQSLKPCV | KLTPLCVTLT | CVANAVTRNN  | -TLHNVTDGI  | GGEIVKCSFN   | TTTVLRDKK  | KVNALFYKLD | IVQIGE---- | ---DNQTYRL  |     |     |
| NYU6564-3-con2          | VDQMHQDIIS | LWDQSLKPCV | KLTPLCVTLT | CVANAVTRNN  | -TLHNVTDGI  | GGEIVKCSFN   | TTTVLRDKK  | KVHALFYKLD | IVQIGE---- | ---DNQTYRL  |     |     |
| NYU6564-4-con           | VDQMHQDIIS | LWDQSLKPCV | KLTPLCVTLT | CVANAVTLNG  | -TLHNVTD--- | -EVKNCSEFN   | TTTVLRDKK  | KVHALFYKLD | IVQIGE---- | ---DNQTYRL  |     |     |
| ---                     |            |            |            |             |             |              |            |            |            |             |     |     |
|                         | 194        |            |            |             |             | N234         |            | N276       | R4         |             |     | 293 |
| Ref.B_HXB2              | TSCNTSVITQ | ACPKVSEFPI | PIHYCAPAGF | AILKCNKNTF  | IGTGPCKNVS  | TVQCTHGIRP   | VVSTQLLLNG | SLAEDEVVIR | SEITTNNAKI | IIVQLNVSVE  |     |     |
| NYU6564-1-con           | INCNTSAITR | ACPKVNFEPH | PIHYCAPAGF | AILKCKDKAF  | IGTGPCNVNS  | TVQCTHGIRP   | VVSTQLLLNG | SLAEDEVVIR | SEITTNNAKI | IIVQLVRPIK  |     |     |
| NYU6564-2-con1          | INCNTSAITQ | ACPKVSEFPI | PIHYCAPAGF | AILKCNKDNF  | IGTGPCKNVS  | TVQCTHGIRP   | VVSTQLLLNG | SLAEDEVIMV | SEITTNNAKI | IIVQLRAPVK  |     |     |
| NYU6564-2-con2          | INCNTSAITQ | ACPKVSEFPI | PIHYCAPAGF | AILKCNKDNF  | IGTGPCKNVS  | TVQCTHGIRP   | VVSTQLLLNG | SLAEDEVIMV | SEITTNNAKI | IIVQLRTPVK  |     |     |
| NYU6564-3-con1          | INCNTSAITQ | ACPKVSEFPI | PIHYCAPAGF | AILKCNKDNF  | IGTGPCKNVS  | TVQCTHGIRP   | VVSTQLLLNG | SLAEDEVIMV | SEITTNNAKI | IIVQLRTPVK  |     |     |
| NYU6564-3-con2          | INCNTSAITQ | ACPKVSEFPI | PIHYCAPAGF | AILKCNKDNF  | IGTGPCKNVS  | TVQCTHGIRP   | VVSTQLLLNG | SLAEDEVIMV | SEITTNNAKI | IIVQLRNPVK  |     |     |
| NYU6564-4-con           | INCNTSAITQ | ACPKVSEFPI | PIHYCAPAGF | AILKCNKDNF  | IGTGPCKNVS  | TVQCTHGIRP   | VVSTQLLLNG | SLAEDEVIMV | SEITTNNAKI | IIVQLRNPVK  |     |     |
| -----V3-----            |            |            |            |             |             |              |            |            |            |             |     |     |
|                         | 294        | N301       | R4         |             |             | N332         |            |            |            |             |     | 392 |
| Ref.B_HXB2              | INCTRPNMNT | RKRIRIQRGP | GRAFVTIGK- | IGNMRQAHCH  | ISRAKWNNIL  | KQIASKLREQ   | FGNNKTIIFK | QSSGGDPEIV | THSFNCGGEF | FYCNTSTQLFN |     |     |
| NYU6564-1-con           | INCTRPNMNT | RISTR--IGP | GQAFYTTGDI | IGDIRRAHCH  | KQTEWDNTL   | QEVTTRLGEY   | FGINDTIIFN | KSSGGDVEIT | THSFNCGGEF | FYCNTSRLLFD |     |     |
| NYU6564-2-con1          | IVCIRPNMNT | RTGVH--IGP | GQTFYAIGDI | TGDIRQAHCH  | ISKIQWNNTAL | QVQGAQLQRY   | FGNNTTITFV | NSSGGDLEVT | THSFNCGGEF | FYCNTSGLFN  |     |     |
| NYU6564-2-con2          | IVCIRPNMNT | RKGVH--IGP | GQTFYAIGDI | TGDIRQAHCH  | ISKIQWNNTL  | QRVGAQLQEQY  | FGNNTTITFA | NSSGGDLEIT | THSFNCGGEF | FYCNTSGLFN  |     |     |
| NYU6564-3-con1          | IVCIRPNMNT | RKGVH--IGP | GQTFYAIGDI | TGDIRQAHCH  | ISKIQWNNTAL | QVQGAQLQEQY  | FGNNTTITFA | NSSGGDLEIT | THSFNCGGEF | FYCNTSGLFN  |     |     |
| NYU6564-3-con2          | IVCIRPNMNT | RTGVH--IGP | GQTFYAIGDI | IGDIRQAHCH  | ISKKDWNTTL  | QKVGQAQLQEQY | FGNNTTITFA | NSSGGDLEIT | THSFNCGGEF | FYCNTSGLFN  |     |     |
| NYU6564-4-con           | IVCIRPNMNT | RTGVH--IGP | GQTFYAIGDI | IGDIRQAHCH  | ISKKDWNEAL  | QKVGQAQLQEQY | FGNDTTITFA | NSSGGDLEIT | THSFNCGGEF | FYCNTSGLFN  |     |     |
| -----V4-----V5-----     |            |            |            |             |             |              |            |            |            |             |     |     |
|                         | 393        |            |            | R4          | R4          |              | R4         |            | R4         |             |     | 483 |
| Ref.B_HXB2              | STWFNS--TW | STEGSN-NTE | GSDTITLPCR | IRQIIVNMWQK | VGKAMYAPPI  | SGQIRCSSNI   | TGLLLTRDGG | NSN-----N  | ESEIFRFGGG | DMRDNRWSEL  |     |     |
| NYU6564-1-con           | STWRKNDNNW | TNTA-NTTSN | GNDTITLQCR | IRQIIVNMWQK | VGLAMYAPPI  | RGIIRCNSTI   | TGLLLTRDGG | KENNSTKNGT | GNETFRFGGG | DMRDNRWSEL  |     |     |
| NYU6564-2-con1          | G-----TW   | NGTNSTI-ND | SNETITLPCR | IRQIIVNMWQR | VGQAMYAPPI  | SGIIRCENSI   | TGLLLTRDGG | DNT-----S  | SSEIFRFGGG | DMRDNRWSEL  |     |     |
| NYU6564-2-con2          | GTFNG---TW | NGTNSTISSD | SNETITLPCR | IRQIIVNMWQR | VGQAMYAPPI  | SGIIRCENSI   | TGLLLTRDGG | DNT-----N  | NSEIFRFGGG | DMRDNRWSEL  |     |     |
| NYU6564-3-con1          | GTFNG---TW | NGTNSTIS-D | SNETITLPCR | IRQIIVNMWQR | VGQAMYAPPI  | SGIIRCENSI   | TGLLLTRDGG | DNT-----S  | SSEIFRFGGG | DMRDNRWSEL  |     |     |
| NYU6564-3-con2          | GTFNG---TW | NGTYSNIS-N | SNETITLPCR | IRQIIVNMWQR | VGQAMYAPPI  | SGIIRCENSI   | TGLLLTRDGG | NNKT----N  | NSEIFRFGGG | DMRDNRWSEL  |     |     |
| NYU6564-4-con           | GTFNG---TW | NGTNSTIS-N | STENITLPCR | IRQIIVNMWQR | VGQAMYAPPI  | SGAIIRCENSI  | TGLLLTRDGG | NNT-----N  | KKEIFRFGGG | DMRDNRWSEL  |     |     |
| -----gp120▼gp41-----531 |            |            |            |             |             |              |            |            |            |             |     |     |
|                         | 484        |            |            |             |             |              |            |            |            |             |     | 531 |
| Ref.B_HXB2              | YKYKVVQIEP | LGVAPTKAKR | RVVQREKR-A | VGIGALFLGF  | LGAAGSTMG   |              |            |            |            |             |     |     |
| NYU6564-1-con           | YKYKVVQIEP | LGVAPTHAKR | RVVEREKR-A | VGLGAFPLGF  | LGAAGSTMG   |              |            |            |            |             |     |     |
| NYU6564-2-con1          | YKYKVVQIEP | LGVAPTRAKR | RVVEREKRAA | IGLGALFLGF  | LGAAGSTMG   |              |            |            |            |             |     |     |
| NYU6564-2-con2          | YKYKVVQIEP | LGVAPTRAKR | RVVEREKRAA | IGLGALFLGF  | LGAAGSTMG   |              |            |            |            |             |     |     |
| NYU6564-3-con1          | YKYKVVQIEP | LGVAPTRAKR | RVVEREKRAA | IGLGALFLGF  | LGAAGSTMG   |              |            |            |            |             |     |     |
| NYU6564-3-con2          | YKYKVVQIEP | LGVAPTRAKR | RVVEREKRAA | IGLGALFLGF  | LGAAGSTMG   |              |            |            |            |             |     |     |
| NYU6564-4-con           | YKYKVVQIEP | LGVAPTRAKR | RVVEREKRAA | IGLGALFLGF  | LGAAGSTMG   |              |            |            |            |             |     |     |

- N-Glycosylation sites of bnAbs
- Site of immune pressure in RV144
- Sites of resistance to CD4bs bnAbs

# 6501 - bnAb + CD4 epitopes / N-Glycosylation sites

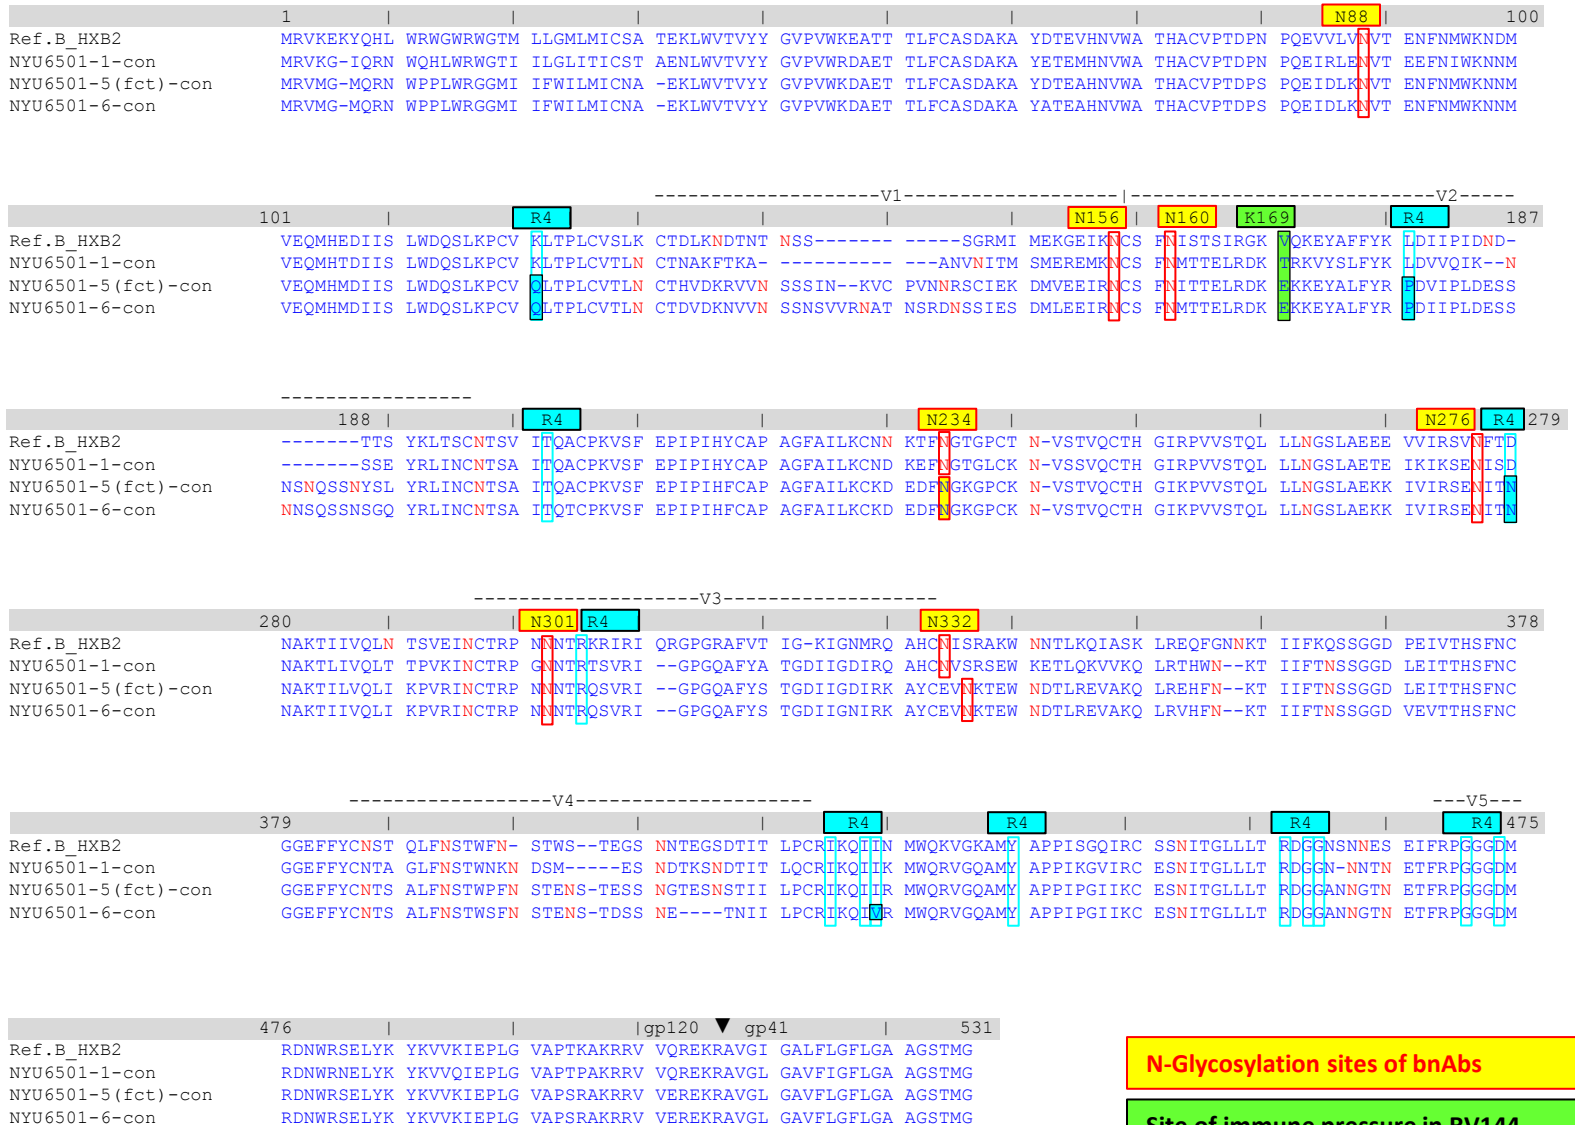

**S11 Fig. Env amino acid alignment with indicated bnAb epitope regions and sites of immune pressure.**

Consensus Env amino acid sequences were aligned with reference sequence HXB2. The N-glycosite tool from the Los Alamos HIV database was used to highlight N-glycosylation sites, red. N-glycosylation sites critical for selected bnAbs are boxed in red: N88 (gp120/gp41 interphase bnAb 35O22), N156 and N160 (V2 glycan bnAbs, e.g. PG9/PG16), N234 and N276 (gp120/gp41 interphase bnAb 8ANC195), N301 and N332/N334 (V3 glycan bnAbs, e.g. PGT121/PGT128). Mutated N-glycosylation sites are highlighted in yellow. The site of immune pressure (169 in V2), as described in the RV144 vaccine trial, and sites of resistance to CD4bs bnAbs are boxed in green and blue, respectively, according to deCamp et al. 2014 [18]. Critical mutations at both sites are highlighted in respective colors. **A)** Alignment of NYU6501 Env amino acid sequences. **B)** Alignment of NYU6564 Env amino acid sequences.
