# Supplementary material for: Contrasting antibody responses to intrasubtype superinfection with CRF02_AG
Source: PubMed Central journal article supplement (PMC5348025; doi:10.1371/journal.pone.0173705), 2017-03-13
Supplement: pone.0173705.s014.pdf [file pone.0173705.s014.pdf]

| EC 50s     | NYU6501          |                   |                               | NYU6564          |                   |                               |
|------------|------------------|-------------------|-------------------------------|------------------|-------------------|-------------------------------|
|            | Pre SI<br>6501-3 | Post SI<br>6501-5 | App.<br>Affinity<br>fold diff | Pre SI<br>6564-1 | Post SI<br>6564-4 | App.<br>Affinity<br>fold diff |
| V1V2       | 30               | 3                 | ↑ <b>10</b>                   | 90               | 34                | ↑3                            |
| V3         | 23               | 12                | ↑2                            | 31               | 380               | ↓ <b>12</b>                   |
| MPER gp41  | 176              | 258               | ≈1                            | 124              | 144               | ≈1                            |
| gp120 core | 4                | 3                 | ≈1                            | 1                | 6                 | ↓ <b>6</b>                    |
| SOSIP      | 44               | 16                | ↑3                            | 46               | 133               | ↓3                            |

**S2 Table. EC50 values of IgG binding to Env antigens.** EC50 values and fold changes in apparent affinities after superinfection are listed in the table. Nonlinear regression curves and EC50 values were calculated in GraphPad Prism. In bold are fold changes in apparent affinity greater than 5. Colors of antigens correspond to coloring in main **Fig 4**.
