# Supplementary material for: Contrasting antibody responses to intrasubtype superinfection with CRF02_AG
Source: PubMed Central journal article supplement (PMC5348025; doi:10.1371/journal.pone.0173705), 2017-03-13
Supplement: pone.0173705.s015.pdf [file pone.0173705.s015.pdf]

| Sequence    | Residues |    |    |    | Nonsynonymous |           |    |          | Isofunctional |           |    |          |
|-------------|----------|----|----|----|---------------|-----------|----|----------|---------------|-----------|----|----------|
|             | V1V2     | V1 | V2 | V3 | V1V2          | Glycan V2 | V3 | V3 Crown | V1V2          | Glycan V2 | V3 | V3 Crown |
| 6501-1 con  | 68       | 30 | 39 | 35 | --            | --        | -- | --       | --            | --        | -- | --       |
| 6501-5 con  | 89       | 42 | 48 | 35 | 44            | 2         | 4  | 0        | 8             | 2         | 1  | 1        |
| 6501-6 con  | 92       | 45 | 48 | 35 | 43            | 2         | 5  | 0        | 10            | 1         | 1  | 1        |
| Antigen     | 66       | 22 | 45 | 35 | 25            | 3         | 6  | 2        | 12            | 4         | 2  | 2        |
| 6564-1 con  | 76       | 30 | 47 | 35 | --            | --        | -- | --       | --            | --        | -- | --       |
| 6564-2 con1 | 70       | 31 | 40 | 35 | 22            | 2         | 9  | 3        | 10            | 2         | 1  | 1        |
| 6564-2 con2 | 70       | 31 | 40 | 35 | 21            | 3         | 10 | 4        | 11            | 3         | 1  | 1        |
| 6564-3 con1 | 70       | 31 | 40 | 35 | 21            | 4         | 10 | 4        | 13            | 4         | 1  | 1        |
| 6564-3 con2 | 70       | 31 | 40 | 35 | 22            | 3         | 8  | 3        | 11            | 3         | 1  | 1        |
| 6564-4 con  | 66       | 27 | 40 | 35 | 22            | 3         | 8  | 3        | 12            | 3         | 1  | 1        |
| Antigen     | 66       | 22 | 45 | 35 | 28            | 4         | 8  | 3        | 8             | 4         | 2  | 1        |

| Sequence    | Charge |           |    |          | Tropism | Potential N glycosylation sites |      |    |
|-------------|--------|-----------|----|----------|---------|---------------------------------|------|----|
|             | V1V2   | Glycan V2 | V3 | V3 Crown |         | Env                             | V1V2 | V3 |
| 6501-1 con  | 5+     | 2+        | 2+ | 2+       | R5      | 23                              | 4    | 1  |
| 6501-5 con  | 0      | 0         | 3+ | 2+       | R5      | 28                              | 6    | 1  |
| 6501-6 con  | 4-     | 0         | 4+ | 2+       | R5      | 27                              | 6    | 1  |
| Antigen     | 0      | 2+        | 4+ | 3+       | R5      | 24*                             | 5*   | 1* |
| 6564-1 con  | 1+     | 2+        | 3+ | 2+       | X4      | 27                              | 6    | 1  |
| 6564-2 con1 | 2+     | 3+        | 1+ | 1+       | R5      | 25                              | 6    | 1  |
| 6564-2 con2 | 2+     | 3+        | 2+ | 2+       | R5      | 26                              | 6    | 1  |
| 6564-3 con1 | 2+     | 3+        | 2+ | 2+       | R5      | 26                              | 6    | 1  |
| 6564-3 con2 | 2+     | 3+        | 1+ | 1+       | R5      | 26                              | 6    | 1  |
| 6564-4 con  | 1+     | 3+        | 1+ | 1+       | R5      | 25                              | 6    | 1  |
| Antigen     | 0      | 2+        | 4+ | 3+       | R5      | 24*                             | 5*   | 1* |

**S3 Table. Comparison of amino acid characteristics of the envelope clones' variable loops.** Number of amino acid residues, nonsynonymous & isofunctional mutations (compared against first time point sequences), potential N-glycosylation sites, tropism, and charges of the V1V2, V1, V2, Glycan V2, V3, V3 crown regions of consensus *Env* sequences from NYU6501 and NYU6564.

Alignments and potential N-glycosylation sites were determined as described in methods. Genotypic prediction of coreceptor tropism was done using Geno2pheno with 5% false positive rate (see methods). V1V2 and V3 antigens as well as HXB2 (indicated with \*) were used as Reference strains. Consensus sequences were generated as described in methods; the generation of two consensus sequences was done according to similarity in the highlighter plots in **S2 Fig**. Consensus sequences after SI are filled in with red
